# Supplementary material for: Identification and Functional Assessment of Age-Dependent Truncations to Cx46 and Cx50 in the Human Lens
Source: PubMed Central journal article supplement — Invest Ophthalmol Vis Sci. 2016 Oct;57(13):5714–22. doi: 10.1167/iovs.16-19698 (PMC5089213; doi:10.1167/iovs.16-19698), 2016-10
Supplement: iovs-57-11-23_s01.pdf [file iovs-57-11-23_s01.pdf]

# Truncations in the C-terminus of Cx46 and Cx50 from 22- and 19-year old lenses

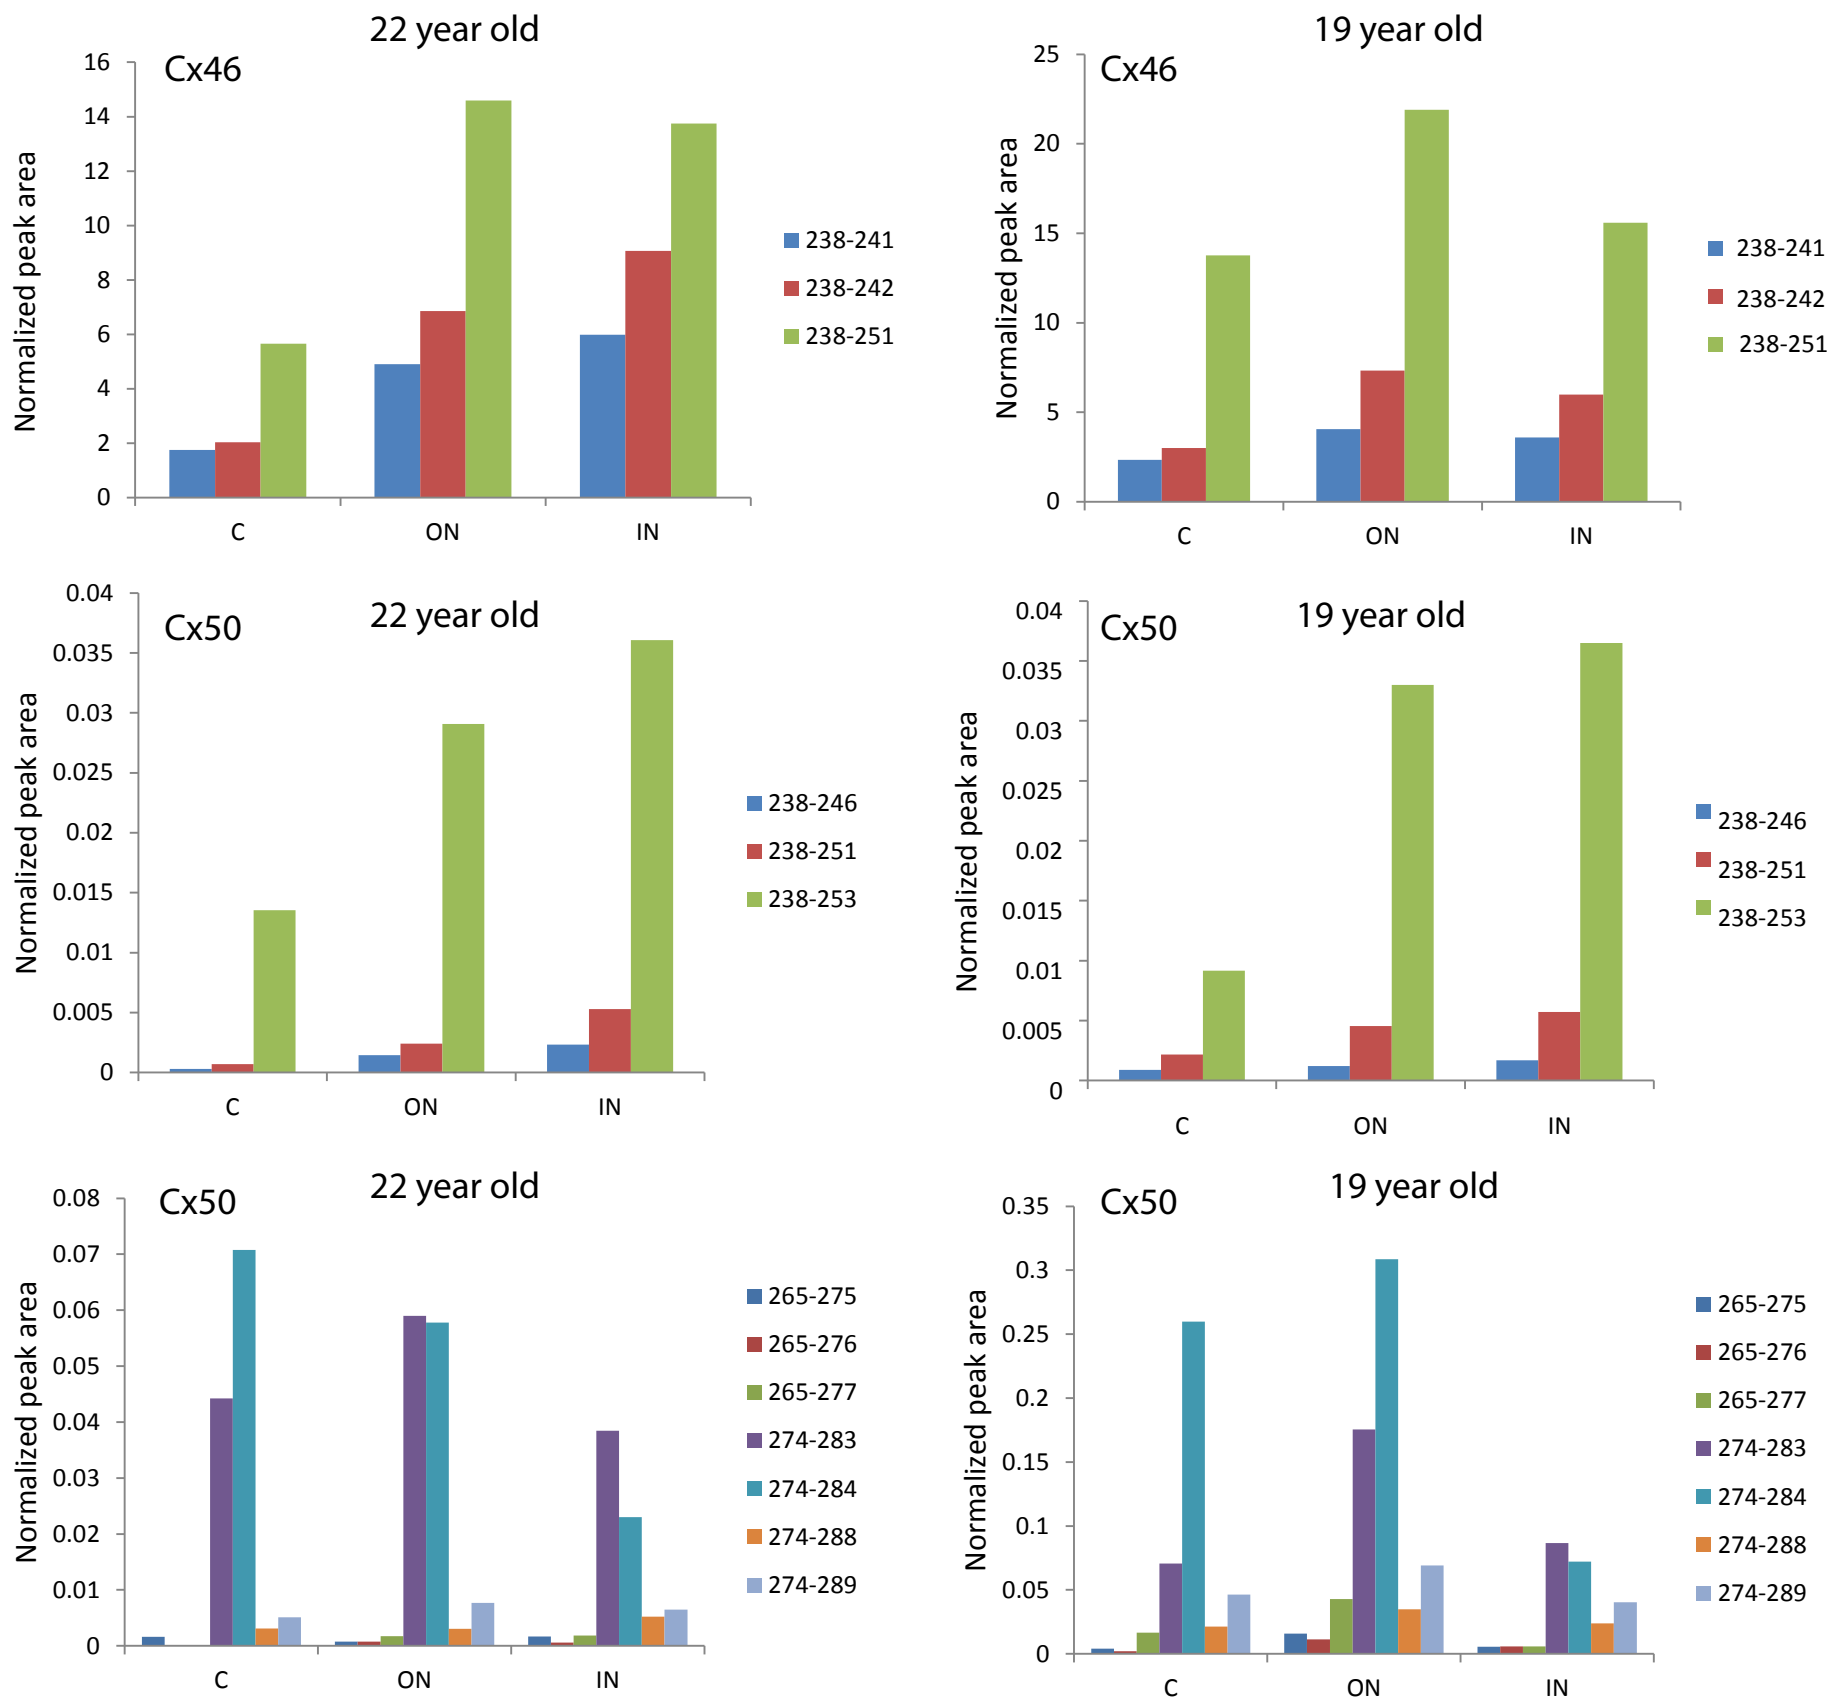

Figure S1

# Truncations in the cytoplasmic loop of Cx46 and Cx50 from 22- and 19-year old lenses

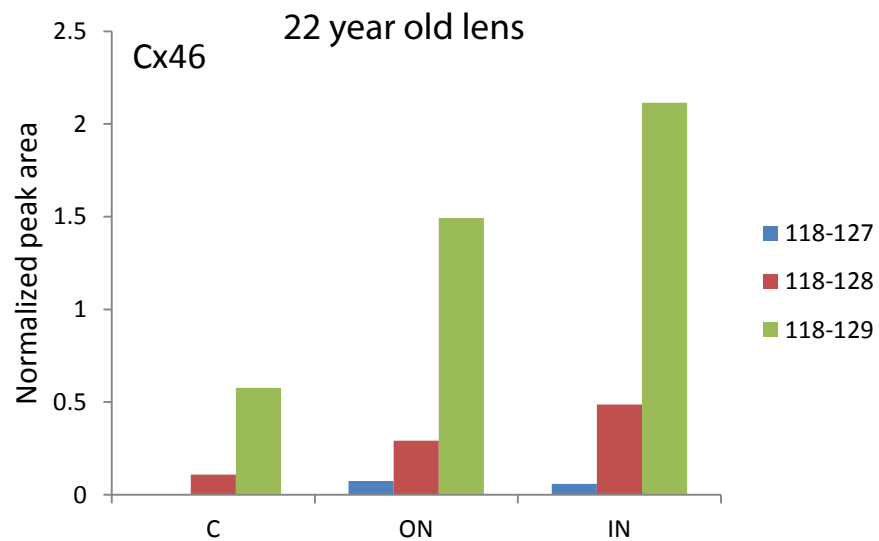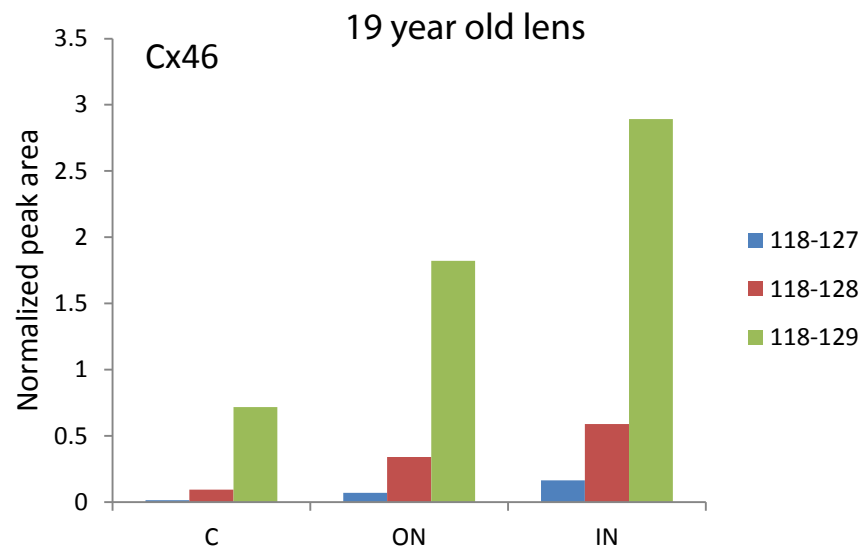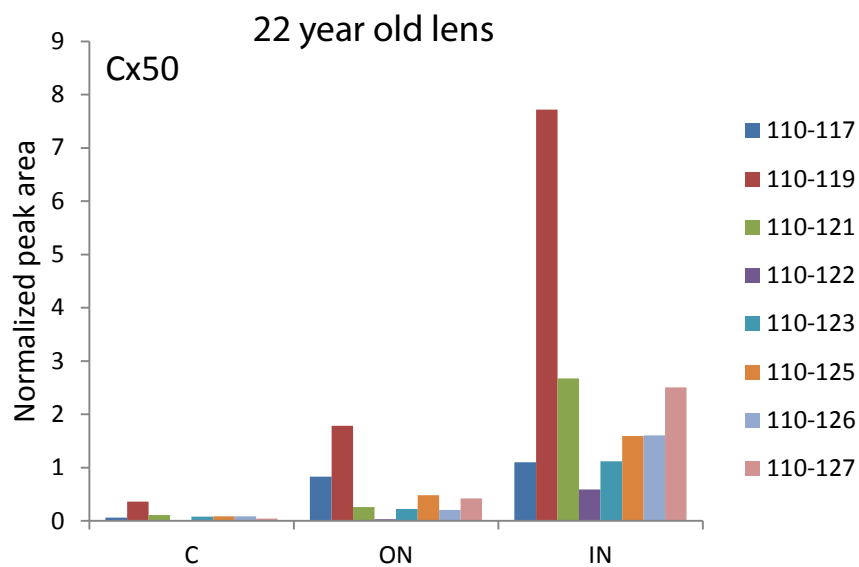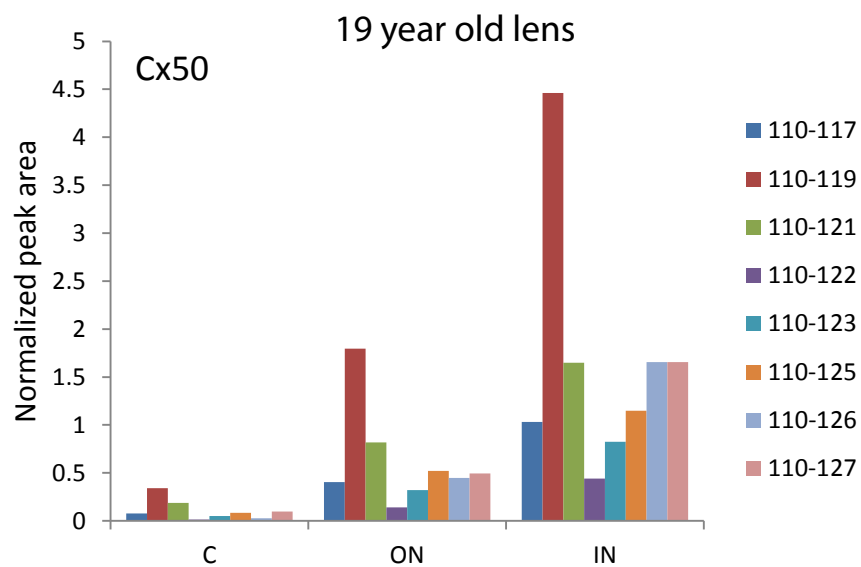

Figure S2

# Tandem mass spectrum of Cx46 238-251(LGPDASEAPLGTAD):

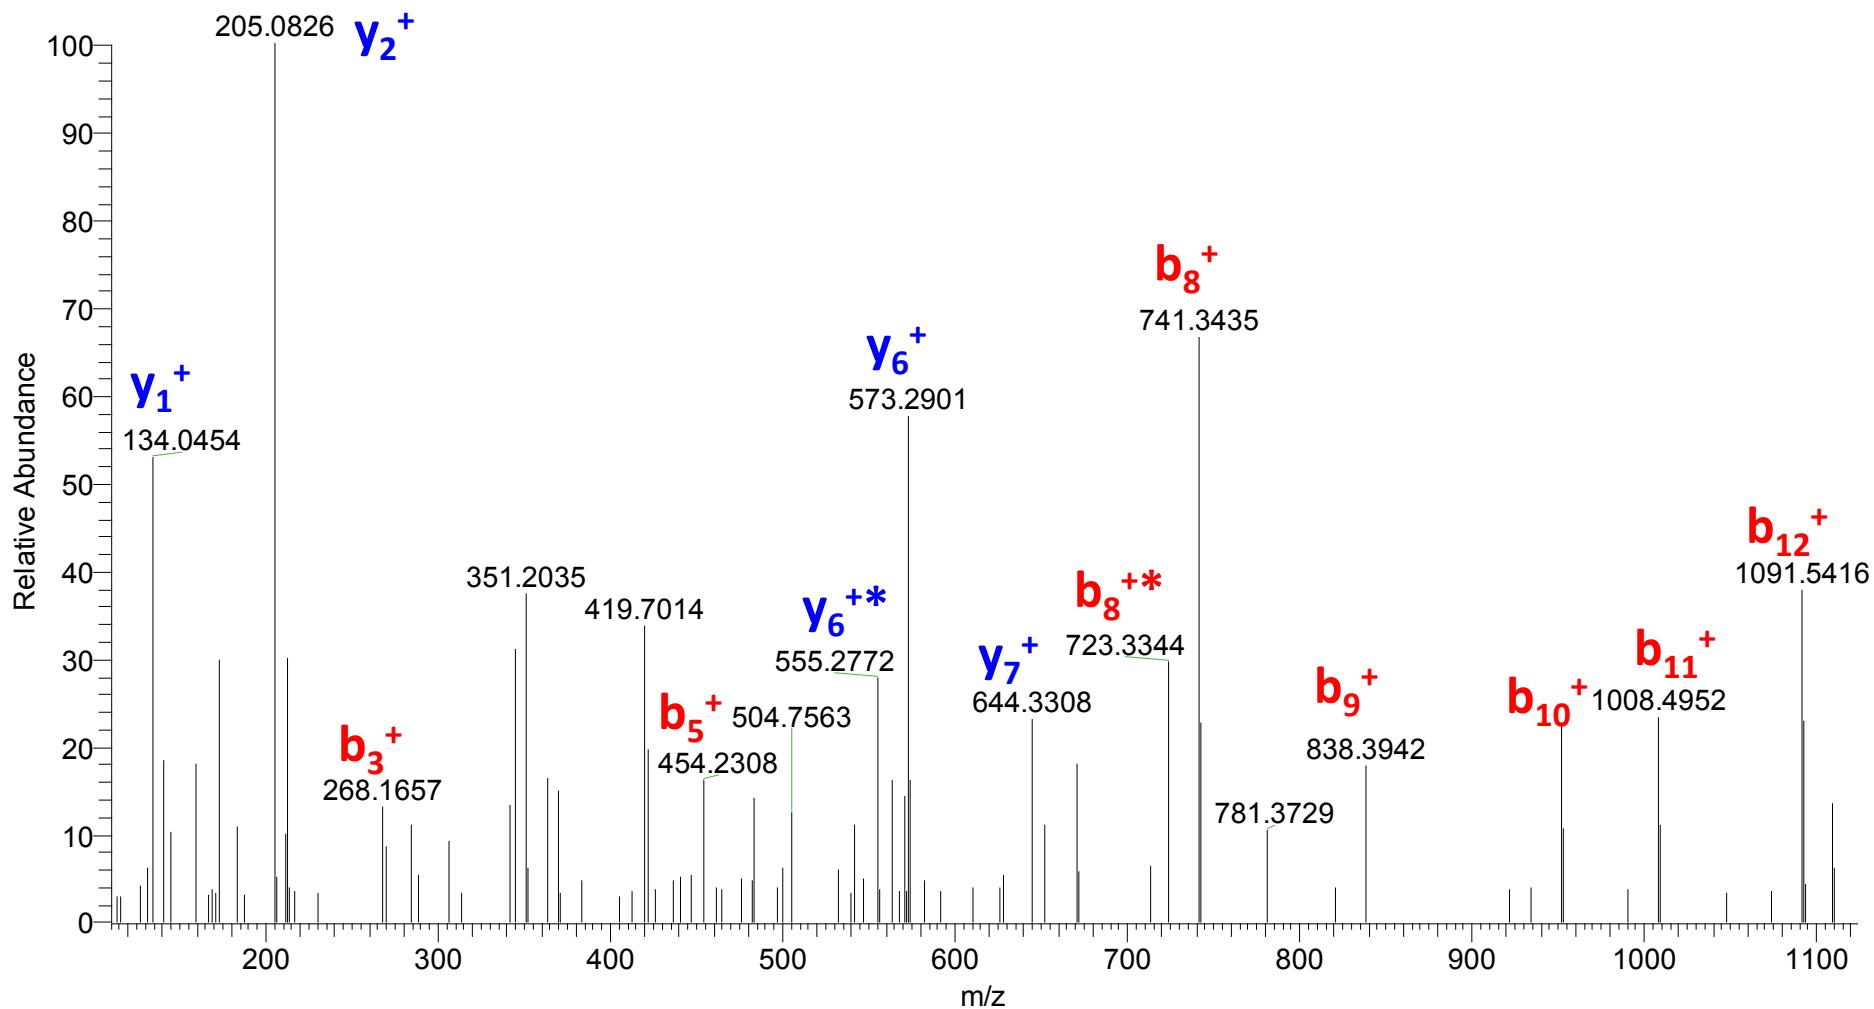

\* Indicates ions losing water

Figure S3

# Tandem mass spectrum of Cx50 238-253(RPVEQPLGEIPEKSLH)

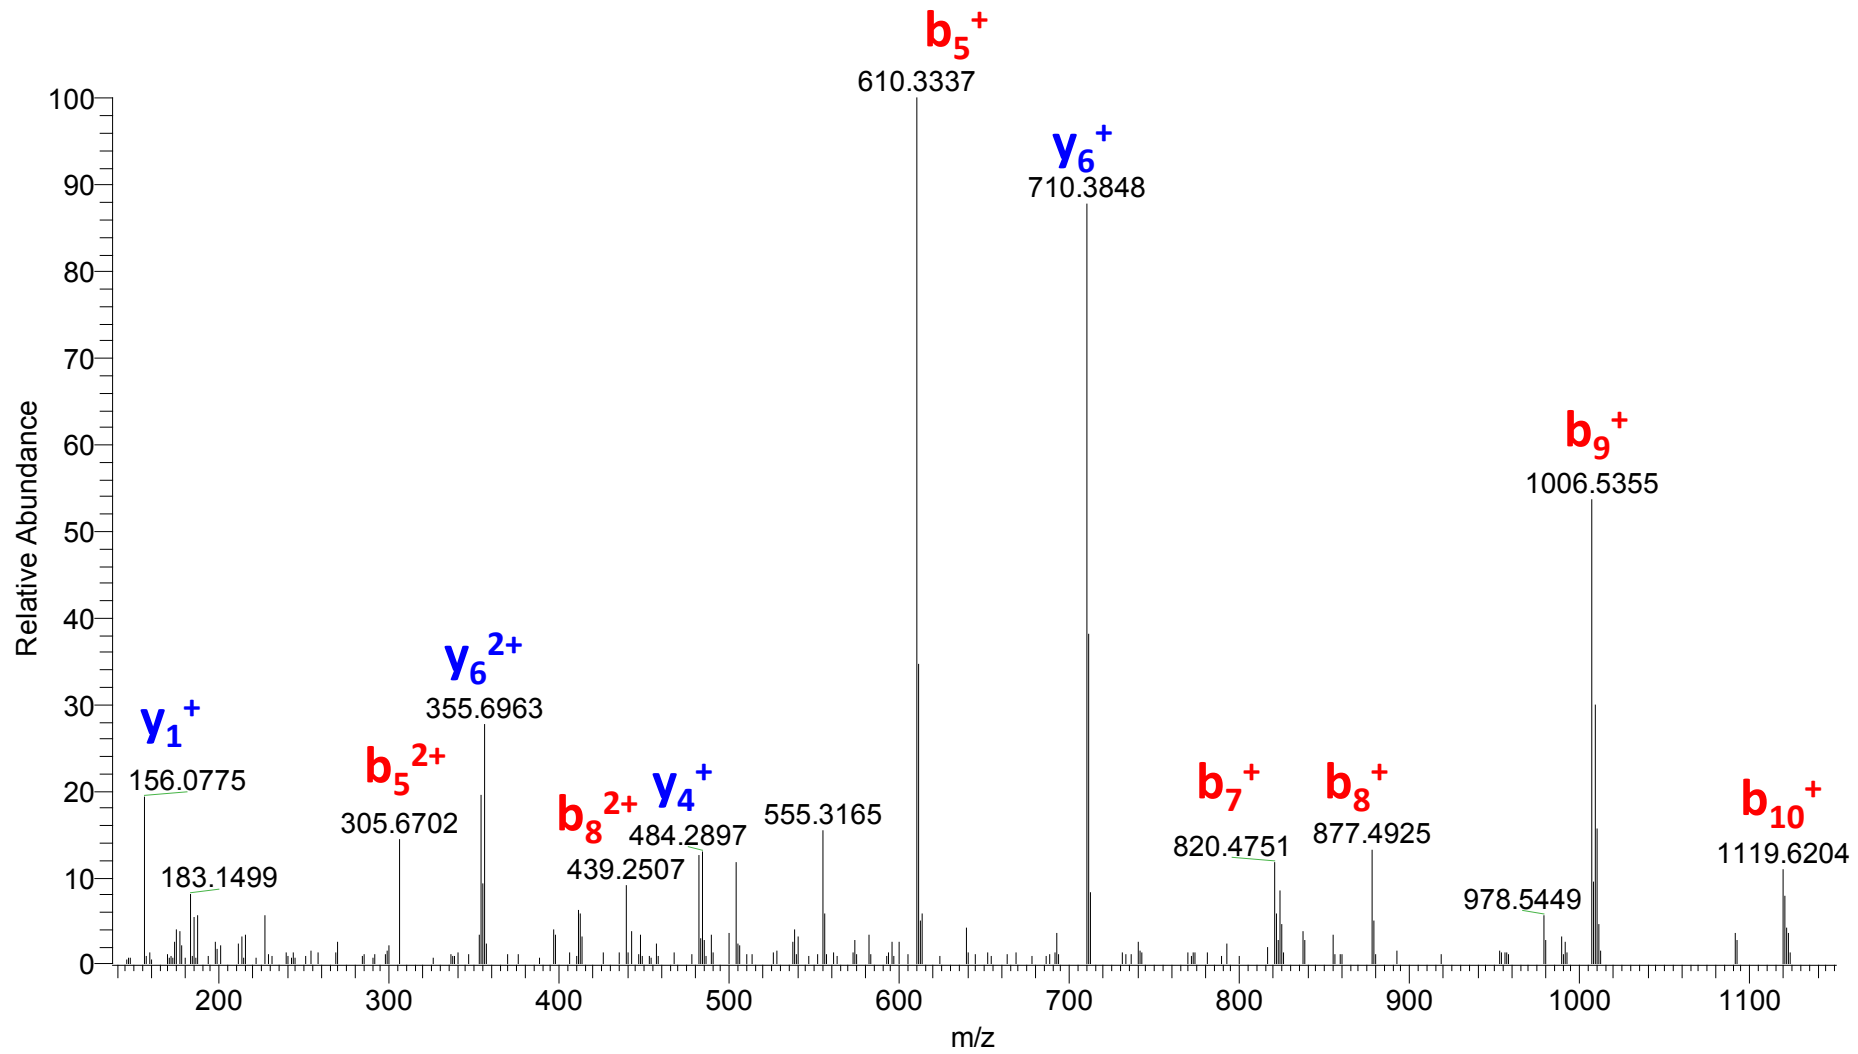

Figure S4

# Tandem mass spectrum of Cx50 274-284 (IVSHYFPLTEV)

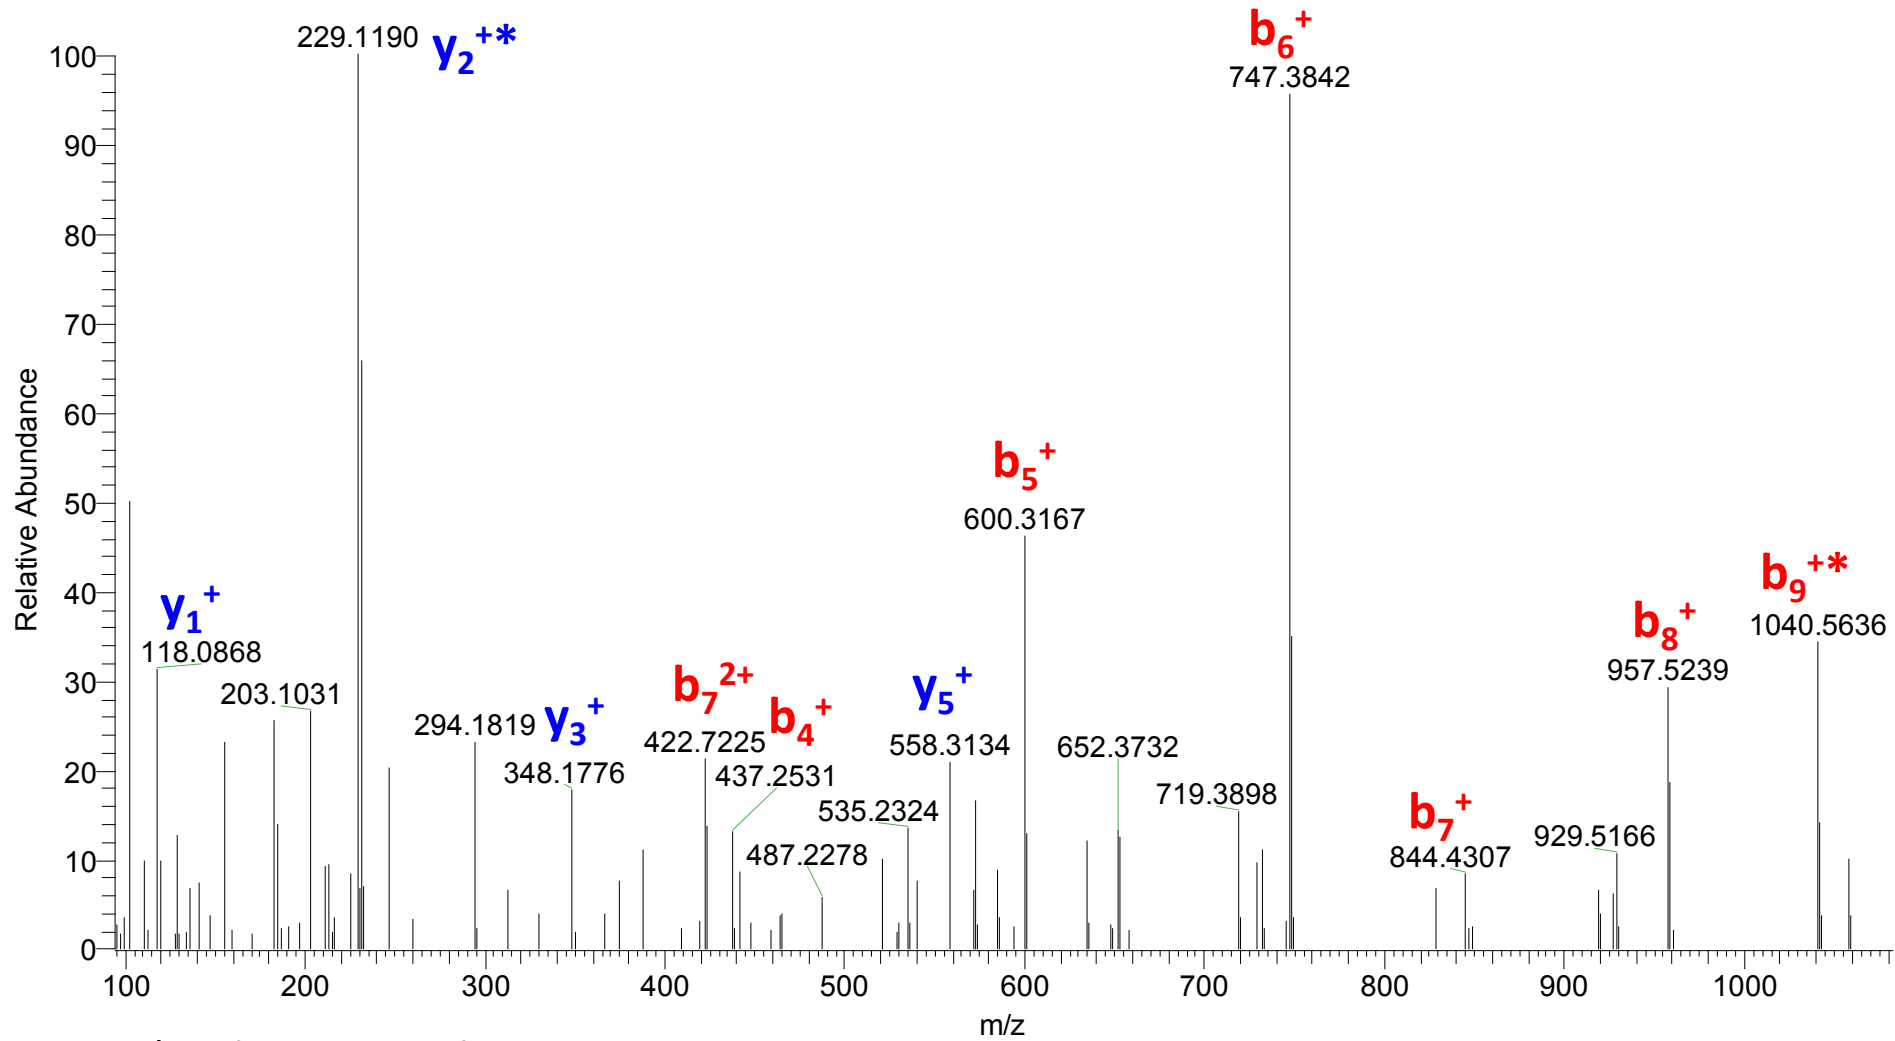

Figure S5

# Tandem mass spectrum of Cx46 3-9 (DWSFLGR)

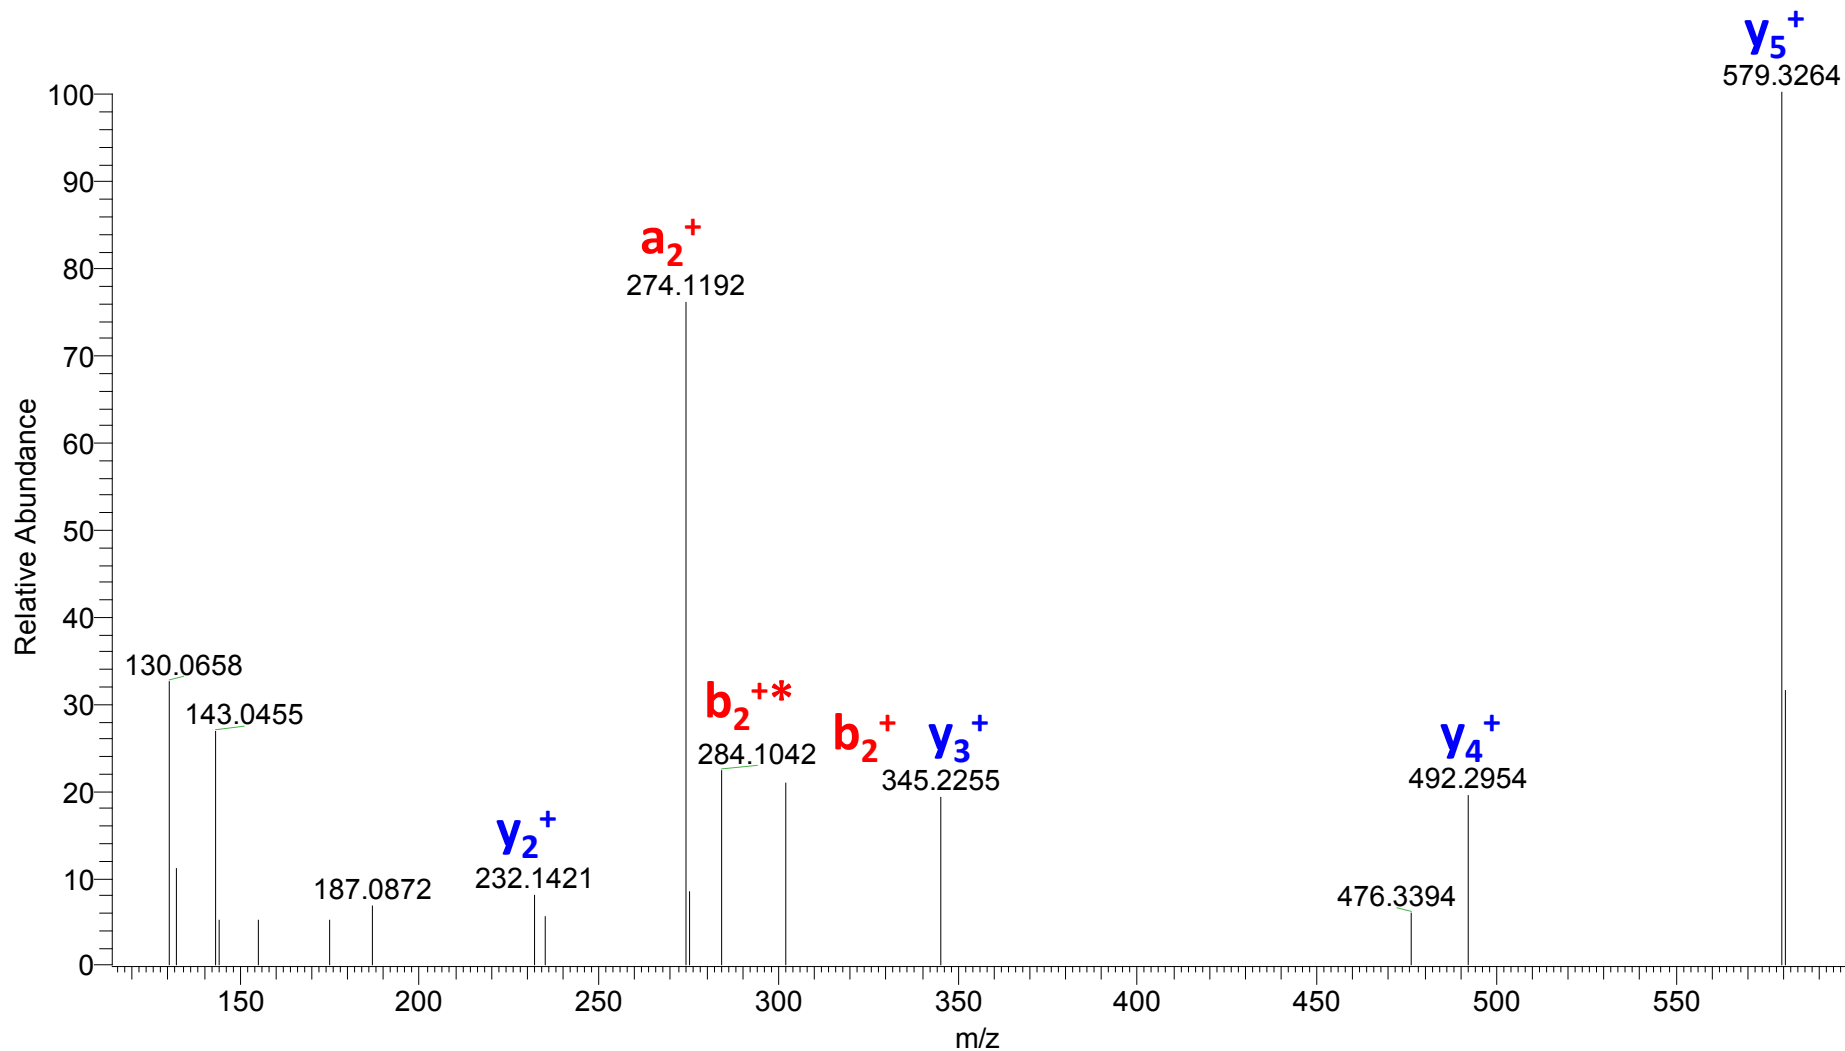

\* Indicates ions losing water

# Tandem mass spectrum of Cx46 118-129 with deamination (ESPSPKEPPQDD)

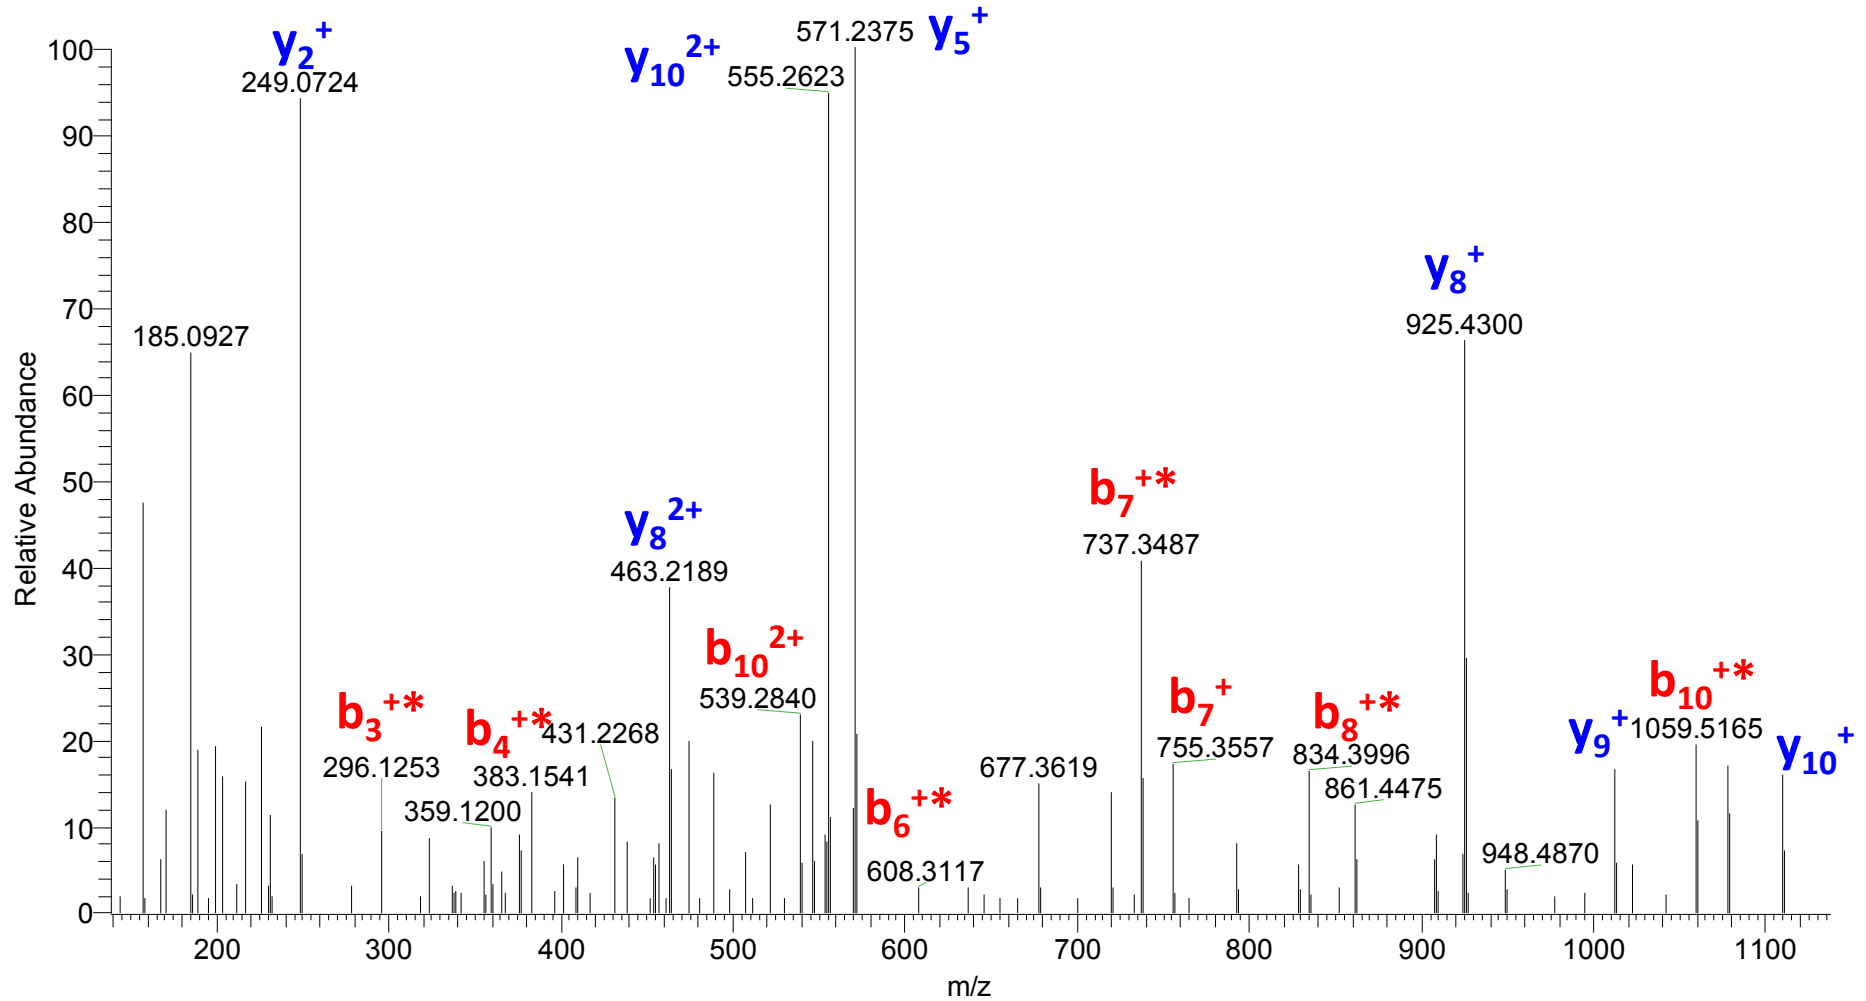

\* Indicates ions losing water

# Tandem Mass Spectrum of Cx50 110-119 (EAEELGQQAG)

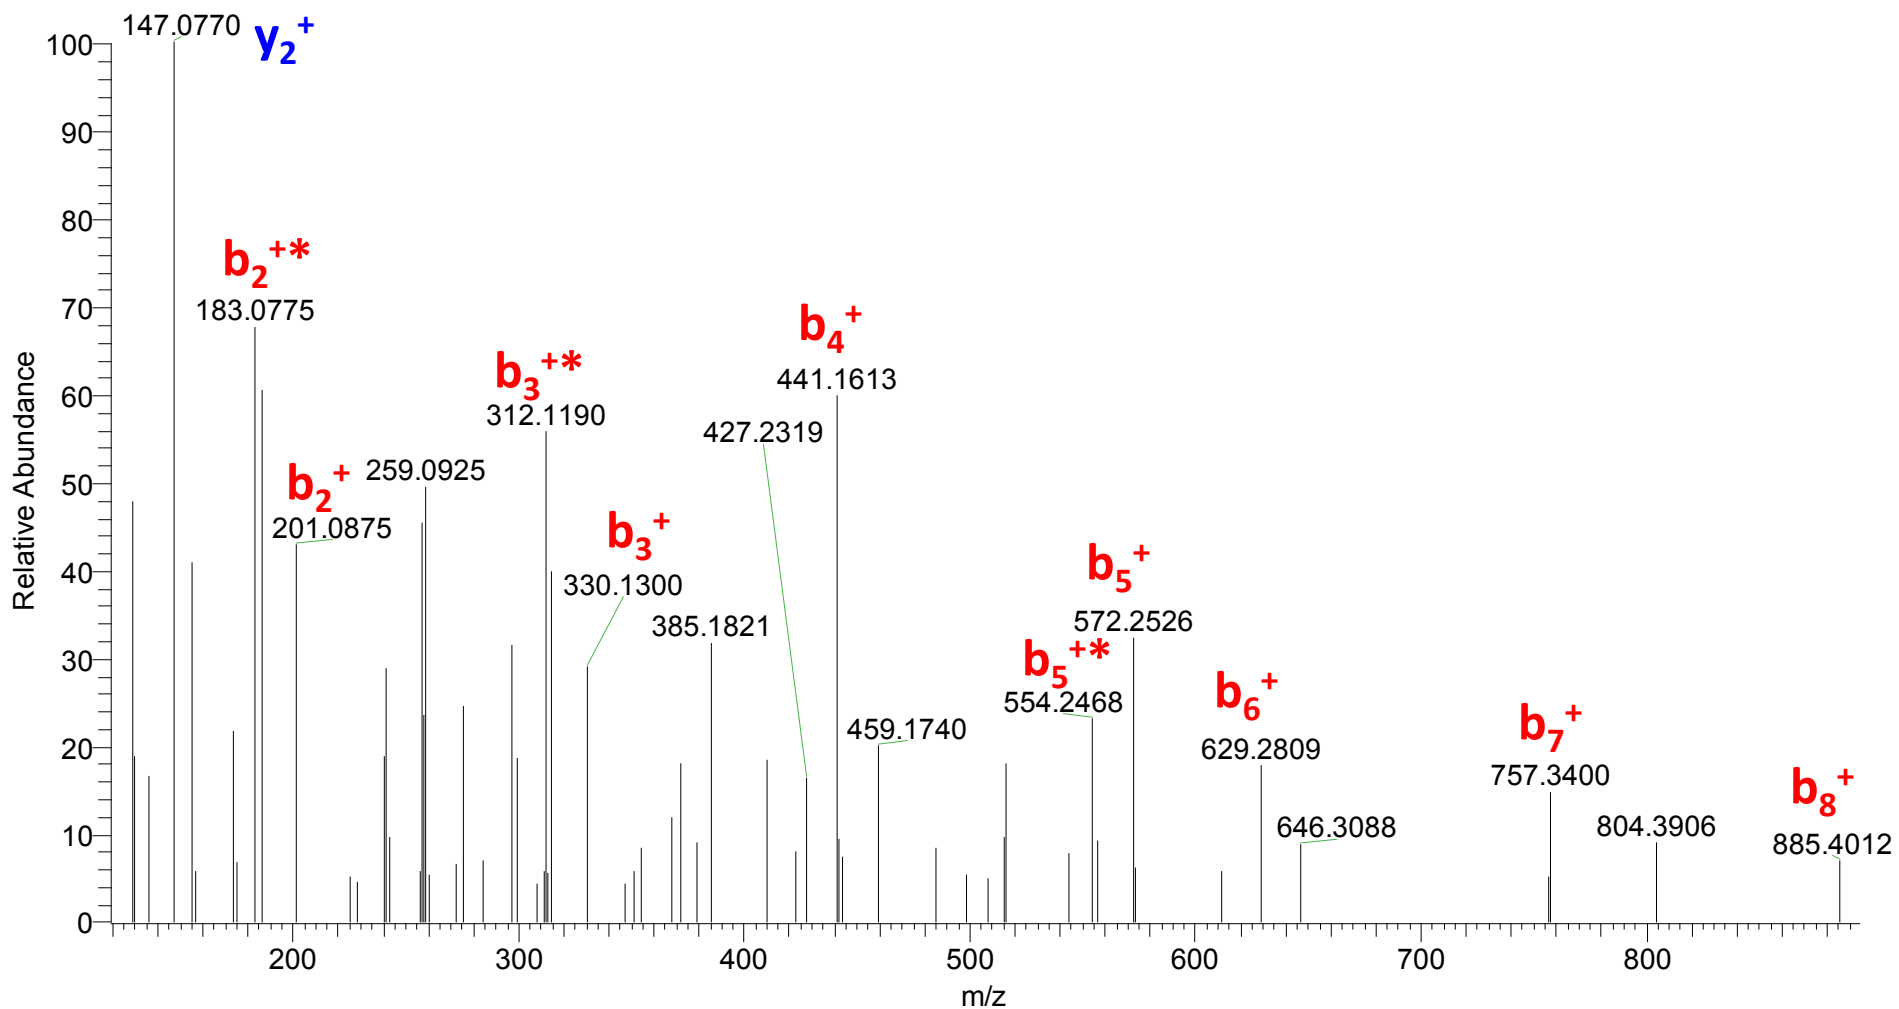

\* Indicates ions losing water

Figure S8
